# Supplementary material for: Population-genomic insights into emergence, crop adaptation and dissemination of Pseudomonas syringae pathogens
Source: PubMed Central journal article supplement (PMC5359406; doi:10.1099/mgen.0.000089), 2016-10-21

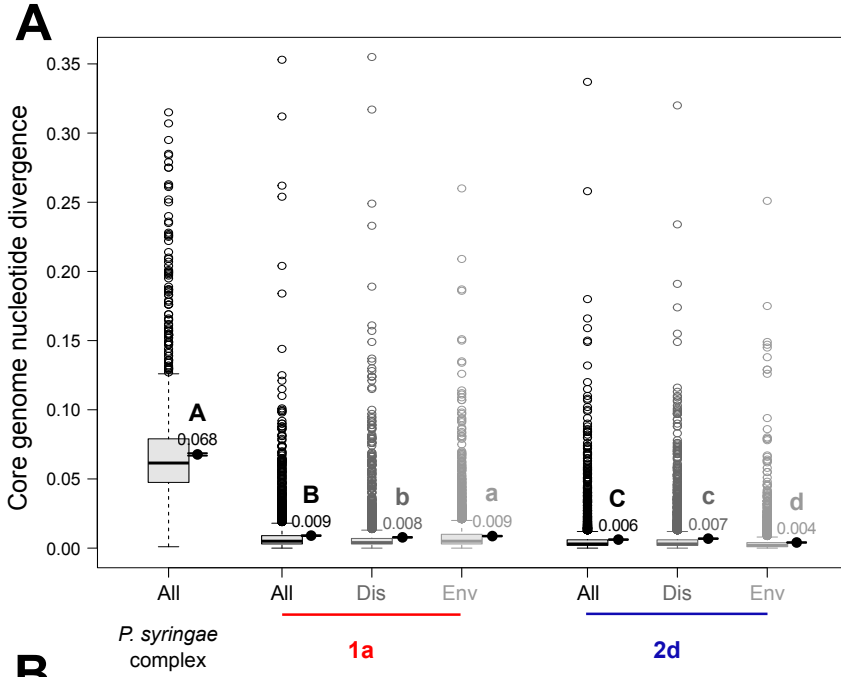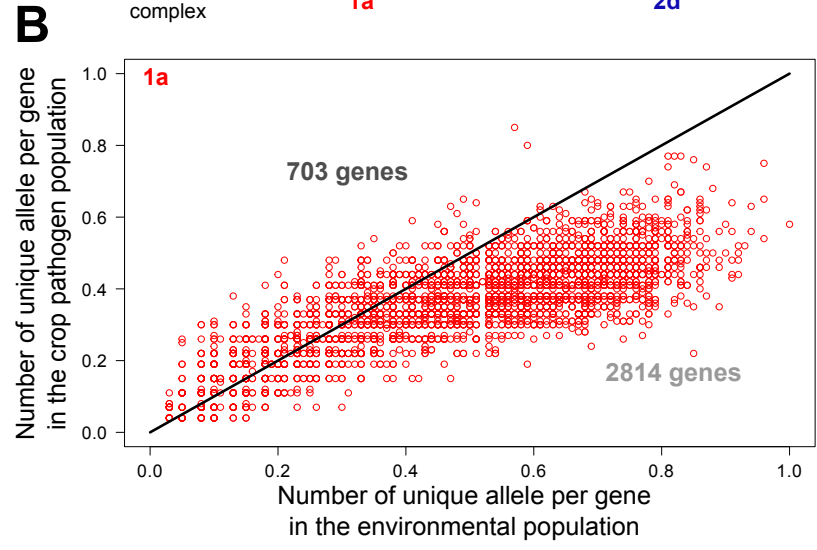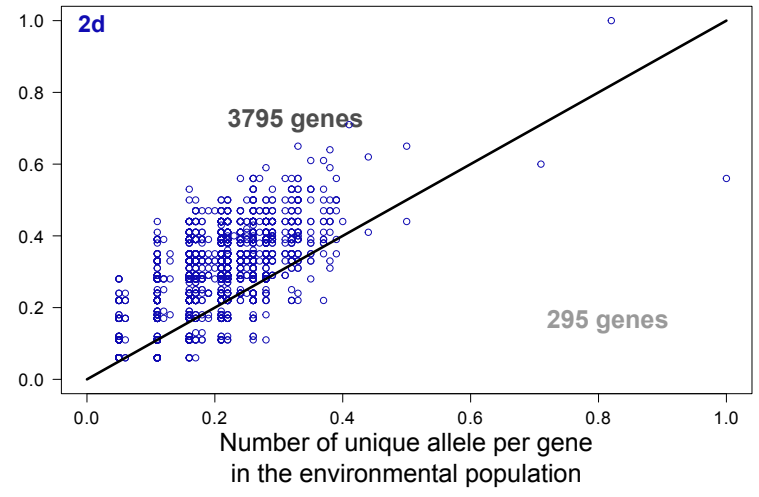

Supplement: mgen-02-89-s008.pdf [file mgen-02-89-s008.pdf]
